# Supplementary material for: Interleukin‐6 and the Risk of Adverse Outcomes in Patients After an Acute Coronary Syndrome: Observations From the SOLID‐TIMI 52 (Stabilization of Plaque Using Darapladib—Thrombolysis in Myocardial Infarction 52) Trial
Source: PubMed Central journal article supplement — J Am Heart Assoc. 2017 Oct 24;6(10):e005637. doi: 10.1161/JAHA.117.005637 (PMC5721825; doi:10.1161/jaha.117.005637), 2017-10-24
Supplement: JAH3-6-e005637-s001.pdf [file JAH3-6-e005637-s001.pdf]

# **Supplemental Material**

**Table S1. Baseline Characteristics in Biomarker Population of SOLID – TIMI 52**

| <b>Endpoint</b>                              | <b>Total Population</b>  | <b>Biomarker Sample</b>  | <b>Non-Biomarker Sample</b> | <b>P-Value</b>   |
|----------------------------------------------|--------------------------|--------------------------|-----------------------------|------------------|
|                                              | <b>No (%)</b>            | <b>N (%)</b>             | <b>N (%)</b>                |                  |
|                                              | <b>N=13,026</b>          | <b>N=4,939</b>           | <b>N=8,087</b>              |                  |
| <b>Age (yrs, median, IQR)</b>                | <b>64 (59, 71)</b>       | <b>64 (59, 71)</b>       | <b>64 (59, 71)</b>          | <b>0.39</b>      |
| <b>BMI (kg/m<sup>2</sup>, median, IQR)</b>   | <b>27.6 (24.8, 31.1)</b> | <b>27.7 (25.0, 31.2)</b> | <b>27.5 (24.8, 30.9)</b>    | <b>0.002</b>     |
| <b>Female</b>                                | <b>3326 (25.5)</b>       | <b>1275 (25.8)</b>       | <b>2051 (25.4)</b>          | <b>0.56</b>      |
| <b>Race</b>                                  |                          |                          |                             | <b>&lt;0.001</b> |
| <b>White</b>                                 | <b>10921 (83.8)</b>      | <b>4343 (87.9)</b>       | <b>6578 (81.3)</b>          |                  |
| <b>Black</b>                                 | <b>315 (2.4)</b>         | <b>126 (2.6)</b>         | <b>189 (2.3)</b>            |                  |
| <b>Asian</b>                                 | <b>1573 (12.1)</b>       | <b>393 (8.0)</b>         | <b>1180 (14.6)</b>          |                  |
| <b>Other</b>                                 | <b>217 (1.7)</b>         | <b>77 (1.6)</b>          | <b>140 (1.7)</b>            |                  |
| <b>Region</b>                                |                          |                          |                             | <b>&lt;0.001</b> |
| <b>North America</b>                         | <b>2806 (21.5)</b>       | <b>1119 (22.7)</b>       | <b>1687 (20.9)</b>          |                  |
| <b>South America</b>                         | <b>955 (7.3)</b>         | <b>392 (7.9)</b>         | <b>563 (7.0)</b>            |                  |
| <b>Western Europe</b>                        | <b>3688 (28.3)</b>       | <b>1489 (30.1)</b>       | <b>2199 (27.2)</b>          |                  |
| <b>Eastern Europe</b>                        | <b>3773 (29.0)</b>       | <b>1489 (30.1)</b>       | <b>2284 (28.2)</b>          |                  |
| <b>Asian Pacific</b>                         | <b>1804 (13.8)</b>       | <b>450 (9.1)</b>         | <b>1354 (16.7)</b>          |                  |
| <b>Hypertension</b>                          | <b>9555 (73.4)</b>       | <b>3658 (74.1)</b>       | <b>5897 (72.9)</b>          | <b>0.15</b>      |
| <b>Hyperlipidemia</b>                        | <b>8356 (64.1)</b>       | <b>3235 (65.5)</b>       | <b>5121 (63.3)</b>          | <b>0.013</b>     |
| <b>Diabetes mellitus</b>                     | <b>4502 (34.6)</b>       | <b>1670 (33.8)</b>       | <b>2832 (35.0)</b>          | <b>0.16</b>      |
| <b>Prior MI</b>                              | <b>4046 (31.1)</b>       | <b>1555 (31.5)</b>       | <b>2491 (30.8)</b>          | <b>0.41</b>      |
| <b>Prior PCI</b>                             | <b>3112 (23.9)</b>       | <b>1165 (23.6)</b>       | <b>1947 (24.1)</b>          | <b>0.53</b>      |
| <b>PAD</b>                                   | <b>1089 (8.4)</b>        | <b>438 (8.9)</b>         | <b>651 (8.0)</b>            | <b>0.10</b>      |
| <b>eGFR &lt;60 ml/min/1.73 m<sup>2</sup></b> | <b>1503 (11.5)</b>       | <b>586 (11.9)</b>        | <b>917 (11.3)</b>           | <b>0.39</b>      |

|                                   |                     |                    |                    |             |
|-----------------------------------|---------------------|--------------------|--------------------|-------------|
| <b>Index Event</b>                |                     |                    |                    | <b>0.88</b> |
| <b>STEMI</b>                      | <b>5883 (45.2)</b>  | <b>2242 (45.4)</b> | <b>3641 (45.0)</b> |             |
| <b>NSTEMI</b>                     | <b>5559 (42.7)</b>  | <b>2104 (42.6)</b> | <b>3455 (42.7)</b> |             |
| <b>Unstable angina</b>            | <b>1584 (12.2)</b>  | <b>593 (12.0)</b>  | <b>991 (12.3)</b>  |             |
| <b>Aspirin</b>                    | <b>12559 (96.4)</b> | <b>4775 (96.7)</b> | <b>7784 (96.3)</b> | <b>0.27</b> |
| <b>P2Y<sub>12</sub> Inhibitor</b> | <b>11501 (88.3)</b> | <b>4367 (88.4)</b> | <b>7134 (88.2)</b> | <b>0.80</b> |
| <b>Statin</b>                     | <b>12317 (94.6)</b> | <b>4682 (94.8)</b> | <b>7635 (94.4)</b> | <b>0.42</b> |
| <b>Beta Blocker</b>               | <b>11364 (87.2)</b> | <b>4345 (88.0)</b> | <b>7019 (86.8)</b> | <b>0.06</b> |
| <b>ACEI or ARB</b>                | <b>10755 (82.6)</b> | <b>4106 (83.1)</b> | <b>6649 (82.2)</b> | <b>0.21</b> |

---

\*continuous variables are presented as medians (IQR, interquartile range) and categorical as numbers (percentages)  
†BMI, body mass index; eGFR, estimated glomerular filtration rate in ml/min/1.73 m<sup>2</sup>; PAD, peripheral artery disease; MI, myocardial infarction; PCI, percutaneous coronary intervention; STEMI, ST-elevation MI; NSTEMI, non-ST-elevation MI; ACEI, angiotensin converting enzyme inhibitor; ARB, angiotensin II receptor blocker

**Table S2. Association of Baseline IL-6 Quartile with Cardiovascular Endpoints after Further Adjustment for Left Ventricular Dysfunction**

| Endpoint    | Hazard Ratio (95% Confidence Interval) |                         |                         | P-Trend      |
|-------------|----------------------------------------|-------------------------|-------------------------|--------------|
|             | Quartile 2<br>(N=998)                  | Quartile 3<br>(N=1005)  | Quartile 4<br>(N=1015)  |              |
| MACE        | <b>1.20 (0.91-1.58)</b>                | <b>1.34 (1.02-1.77)</b> | <b>1.52 (1.11-2.07)</b> | <b>0.006</b> |
| CV Death/HF | <b>1.15 (0.76-1.75)</b>                | <b>1.25 (0.82-1.90)</b> | <b>1.71 (1.10-2.64)</b> | <b>0.016</b> |
| CV Death    | <b>1.03 (0.59-1.79)</b>                | <b>1.41 (0.83-2.41)</b> | <b>1.83 (1.04-3.19)</b> | <b>0.019</b> |
| MI          | <b>1.12 (0.79-1.59)</b>                | <b>1.43 (1.02-2.01)</b> | <b>1.37 (0.92-2.03)</b> | <b>0.063</b> |
| Stroke      | <b>1.46 (0.79-2.7)</b>                 | <b>0.88 (0.44-1.75)</b> | <b>1.36 (0.66-2.81)</b> | <b>0.73</b>  |
| HF Hosp     | <b>1.32 (0.72-2.43)</b>                | <b>1.32 (0.72-2.45)</b> | <b>1.96 (1.04-3.68)</b> | <b>0.045</b> |

\*Quartile 1 as reference group by Cox Proportional Hazard analysis

†MACE, major adverse cardiovascular events including CV death, MI or stroke; CV, cardiovascular; HF, heart failure; MI, myocardial infarction; Hosp, hospitalization; Model adjusted for age, sex, smoking status, body mass index, race (white versus non-white), hypertension, diabetes mellitus, peripheral artery disease, estimated glomerular filtration rate < 60 ml/min/1.73m<sup>2</sup>, hyperlipidemia, prior myocardial infarction, percutaneous coronary intervention, index qualifying event (ST-Elevation MI versus non-STE ACS), days from qualifying event, randomized treatment arm, LDL-cholesterol, biomarkers (hsCRP, Lp-PLA2, hsTnI, and BNP), and left ventricular dysfunction at discharge

**Table S3. Adjusted Risk of Cardiovascular Endpoints by Baseline IL-6 Quartile in NSTEMI ACS Population Only**

| Endpoint    | Hazard Ratio (95% Confidence Interval) |                         |                         | P-Trend     |
|-------------|----------------------------------------|-------------------------|-------------------------|-------------|
|             | Quartile 2<br>(N=694)                  | Quartile 3<br>(N=631)   | Quartile 4<br>(N=539)   |             |
| MACE        | <b>1.11 (0.84-1.47)</b>                | <b>0.95 (0.7-1.28)</b>  | <b>1.2 (0.85-1.69)</b>  | <b>0.49</b> |
| CV Death/HF | <b>1.09 (0.72-1.66)</b>                | <b>0.82 (0.52-1.28)</b> | <b>1.18 (0.74-1.88)</b> | <b>0.79</b> |
| CV Death    | <b>0.95 (0.56-1.63)</b>                | <b>0.78 (0.44-1.37)</b> | <b>1.17 (0.65-2.1)</b>  | <b>0.78</b> |
| MI          | <b>1.05 (0.74-1.51)</b>                | <b>1.07 (0.73-1.55)</b> | <b>1.07 (0.69-1.66)</b> | <b>0.78</b> |
| Stroke      | <b>1.14 (0.61-2.11)</b>                | <b>0.54 (0.25-1.18)</b> | <b>1.3 (0.6-2.8)</b>    | <b>0.98</b> |
| HF Hosp     | <b>1.26 (0.67-2.37)</b>                | <b>1.1 (0.57-2.12)</b>  | <b>1.39 (0.70-2.77)</b> | <b>0.43</b> |

\* Model adjusted for age, sex, smoking status, body mass index, race (white versus non-white), hypertension, diabetes mellitus, peripheral artery disease, estimated glomerular filtration rate < 60 ml/min/1.73m<sup>2</sup>, hyperlipidemia, prior myocardial infarction, percutaneous coronary intervention, days from qualifying event, randomized treatment arm, LDL-cholesterol, hsCRP, Lp-PLA2, hsTnI, and BNP with quartile 1 used as referent group

†NSTEMI, Non-ST-elevation; ACS, acute coronary syndrome; MACE, major adverse cardiovascular events including CV death, MI or stroke; CV, cardiovascular; HF, heart failure; MI, myocardial infarction; Hosp, hospitalization

**Table S4. Adjusted Risk of Cardiovascular Endpoints by Baseline IL-6 Quartile in STEMI Population Only**

| Endpoint    | Hazard Ratio (95% Confidence Interval) |                     |                     | P-Trend |
|-------------|----------------------------------------|---------------------|---------------------|---------|
|             | Quartile 2<br>N=508                    | Quartile 3<br>N=552 | Quartile 4<br>N=641 |         |
| MACE        | 1.29 (0.79-2.1)                        | 1.86 (1.18-2.95)    | 1.96 (1.19-3.24)    | 0.003   |
| CV Death/HF | 1.80 (0.73-4.39)                       | 3.66 (1.60-8.40)    | 5.33 (2.29-12.39)   | <0.001  |
| CV Death    | 1.19 (0.38-3.74)                       | 3.65 (1.35-9.90)    | 4.63 (1.66-12.91)   | <0.001  |
| MI          | 1.41 (0.76-2.61)                       | 1.85 (1.03-3.34)    | 1.68 (0.88-3.22)    | 0.08    |
| Stroke      | 0.95 (0.32-2.84)                       | 1.29 (0.46-3.67)    | 1.27 (0.40-4.06)    | 0.59    |
| HF Hosp     | 2.46 (0.67-8.97)                       | 3.13 (0.89-11.06)   | 5.82 (1.65-20.48)   | 0.005   |

\* Model adjusted for age, sex, smoking status, body mass index, race (white versus non-white), hypertension, diabetes mellitus, peripheral artery disease, estimated glomerular filtration rate < 60 ml/min/1.73m<sup>2</sup>, hyperlipidemia, prior myocardial infarction, percutaneous coronary intervention, days from qualifying event, randomized treatment arm, LDL-cholesterol, hsCRP, Lp-PLA2, hsTnI, and BNP with quartile 1 used as referent group

† STEMI, ST-elevation myocardial infarction; MACE, major adverse cardiovascular events including CV death, MI or stroke; CV, cardiovascular; HF, heart failure; MI, myocardial infarction; Hosp, hospitalization

**Figure S1. Unadjusted 3-Year Kaplan-Meier Event Rates of Cardiovascular Endpoints by Baseline IL-6 Quartile in NSTEMI-ACS Population Only**

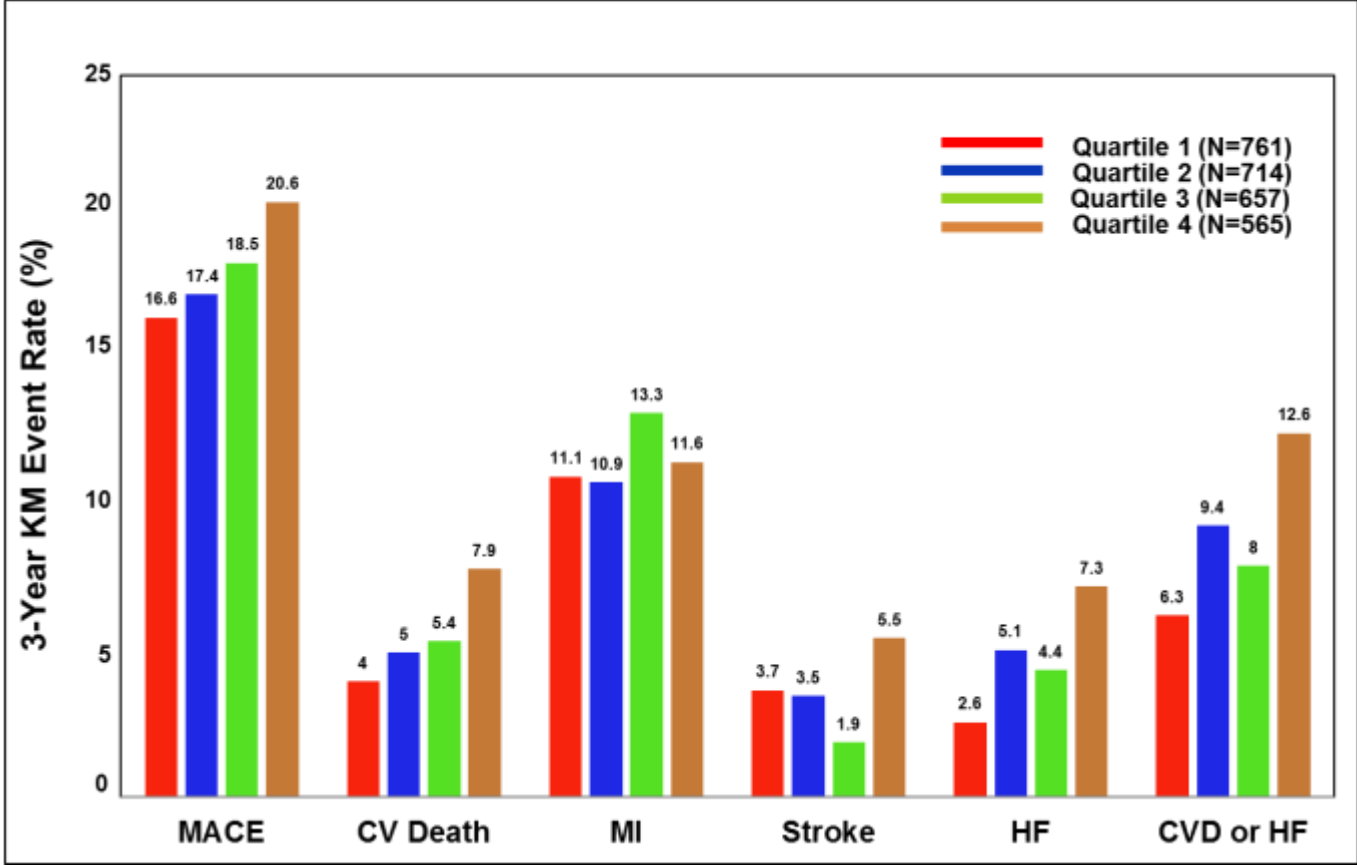

NSTEMI, Non-ST-elevation; ACS, acute coronary syndrome; MACE, major adverse cardiovascular events; CV, cardiovascular; MI, myocardial infarction; HF, heart failure; CVD, cardiovascular death

**Figure S2. Unadjusted 3-Year Kaplan-Meier Event Rates of Cardiovascular Endpoints by Baseline IL-6 Quartile in STEMI Population Only**

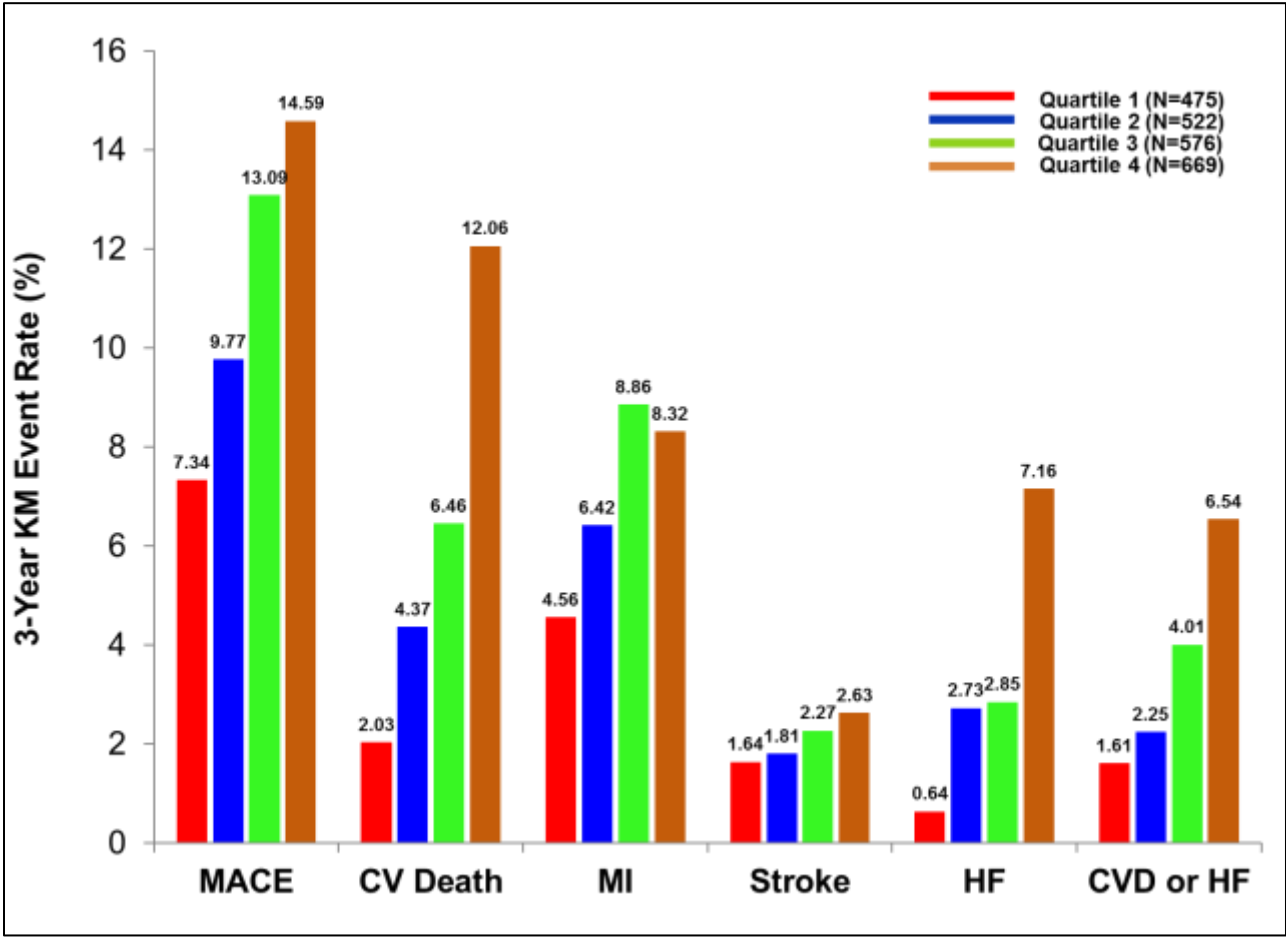

STEMI, ST-Elevation myocardial infarction; MACE, major adverse cardiovascular events; CV, cardiovascular; MI, myocardial infarction; HF, heart failure; CVD, cardiovascular death
